# Supplementary material
Source: MDPI journal article supplement (https://www.mdpi.com/2071-1050/12/18/7409)
Supplement: s1 [file s1]

| Report                                                                                                                  | Given name       | Year of publication | Research period           | Research method                                                                | Plantations visited                                                                                                                                                                    | Participants involved                                                                                                                                                                                                    |
|-------------------------------------------------------------------------------------------------------------------------|------------------|---------------------|---------------------------|--------------------------------------------------------------------------------|----------------------------------------------------------------------------------------------------------------------------------------------------------------------------------------|--------------------------------------------------------------------------------------------------------------------------------------------------------------------------------------------------------------------------|
| The More Things Change – The World Bank, Tata and Enduring Abuses on India’s Tea Plantations                            | Columbia report  | 2014                | May 2010 – May 2013       | Semi-structured interviews, field observations, document analysis              | Fifteen plantations were visited - Achabam, Batabari, Borhat, Borjan, Hathikuli, Chubwa, Dam Dim, Kakajan, Nahorkutia, Namroop, Nowera Nuddy, Rungamuttee, Hattigor, Majuli, Nahorani. | Workers (n = unspecified, in hundreds), individuals from trade unions, student organizations, women’s groups, political parties, academia, health care missions, and government bodies                                   |
| A life without dignity – the price of your cup of tea Abuses and violations of human rights in tea plantations in India | GNRTFN report    | 2016                | June 2015 – December 2016 | Semi-structured interviews, field observations                                 | Eight plantations were visited. The names of plantations visited remain unmentioned und unspecified at the request of the tea plantation workers interviewed.                          | Workers (n = 50), government officials, industry leaders, research scholars, medical professionals, grassroots activist, and trade union members                                                                         |
| The Global Business of Forced Labour – Report of Finding                                                                | Sheffield report | 2018                | April 2016 – March 2018   | Semi-structured interviews, survey, participant observation, document analysis | Twelve plantations were visited; six owned by multinational companies and six owned by India-based companies or the government. Plantation names have been anonymised in the report.   | Workers (n = 30), business leaders from certification organizations and multinational companies, auditors, representatives from industry associations, tea factory managers, tea estate owners, and government officials |

Table S1 – Summary of reports
